# Supplementary material for: Synergetic effects of photocatalysis and peroxymonosulfate activated by FeWO4 for enhanced photocatalytic activity under visible light irradiation
Source: Royal Society of Chemistry journal article supplement (doi:10.1039/d2nj01779b), 2022-01-01
Supplement: d2nj01779b1.pdf [file d2nj01779b1.pdf]

## **Supporting Information**

### **Synergetic effect of photocatalysis and peroxymonosulfate activated by FeWO<sub>4</sub> for enhance photocatalytic activity under visible light irradiation**

**Di Li,<sup>\*a</sup> MingYang Long,<sup>a</sup> Qianqian Zhao,<sup>a</sup> Hongmiao Li,<sup>a</sup> Qi Wen<sup>a</sup> and Fang  
Song<sup>b</sup>**

<sup>a</sup>School of Chemistry and Chemical Engineering, Xi'an University of Architecture  
and Technology, Xi'an, 710055, China

<sup>b</sup>Instrument Analysis Center, Xi'an University of Architecture and Technology,  
Xi'an, 710055, China

**Table 1** A summary of photocatalysts for photocatalytic degradation of doxycycline hydrochloride.

| Sample                                           | Catalyst (mg) | DOX (mg·L <sup>-1</sup> ) | Removal rate (%) |
|--------------------------------------------------|---------------|---------------------------|------------------|
| FeWO <sub>4</sub>                                | 50            | 40 (100 mL)               | 68.975 (60min)   |
| Fe <sub>2</sub> (MoO <sub>4</sub> ) <sub>3</sub> | 50            | 40 (100 mL)               | 67.704 (60min)   |
| FeVO <sub>4</sub>                                | 50            | 40 (100 mL)               | 70.109 (60min)   |

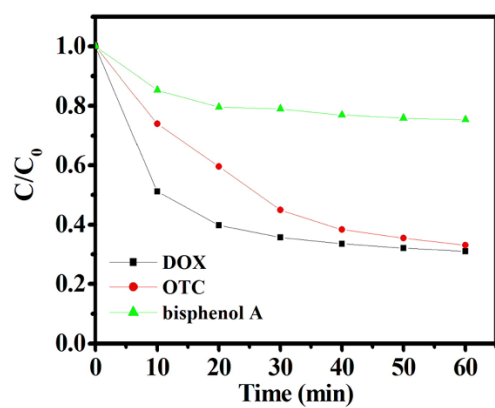

**Fig. 1** The degradation rate of FeWO<sub>4</sub>/Vis/PMS system for different pollutants ([FeWO<sub>4</sub>] = 0.5 g/L, [PMS] = 2 mM, [DOX] = [OTC] = 40 mg/L, [bisphenol A] = 10 mg/L).

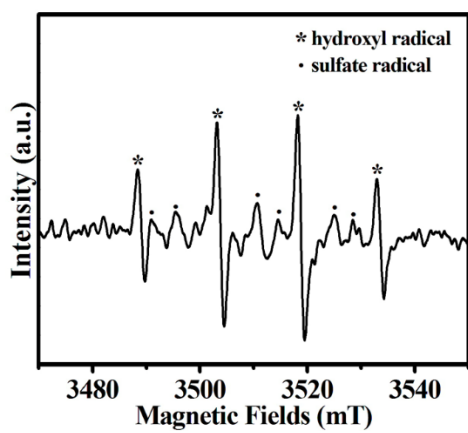

**Fig. 2** EPR spectra of  $\text{FeWO}_4/\text{PMS}$  under visible light irradiation (DMPO as the radical trapper).

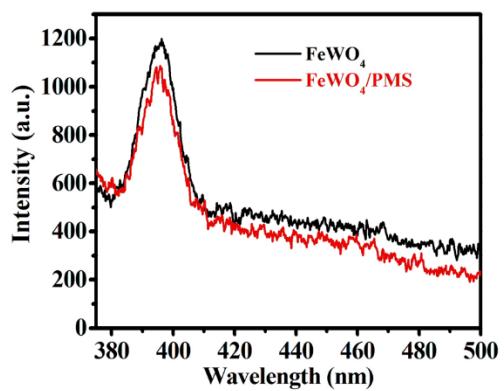

**Fig. 3** Photoluminescence spectra for FeWO<sub>4</sub> suspension with and without PMS ([FeWO<sub>4</sub>] = 0.5 g/L, [PMS] = 2 mM).

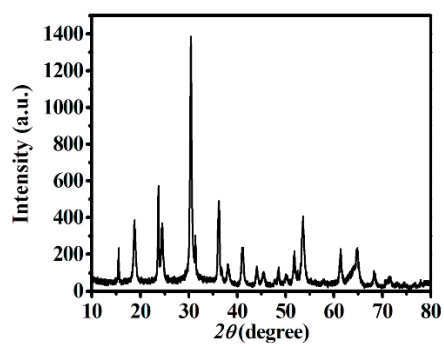

**Fig. 4** XRD pattern of  $\text{FeWO}_4$  after photocatalytic oxidation of DOX.

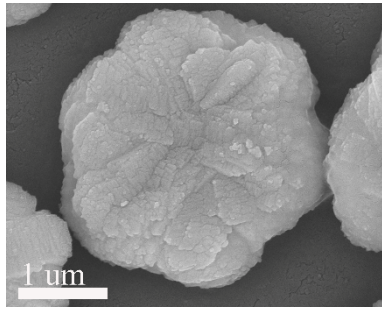

**Fig. 5** SEM image of  $\text{FeWO}_4$  after photocatalytic oxidation of DOX.

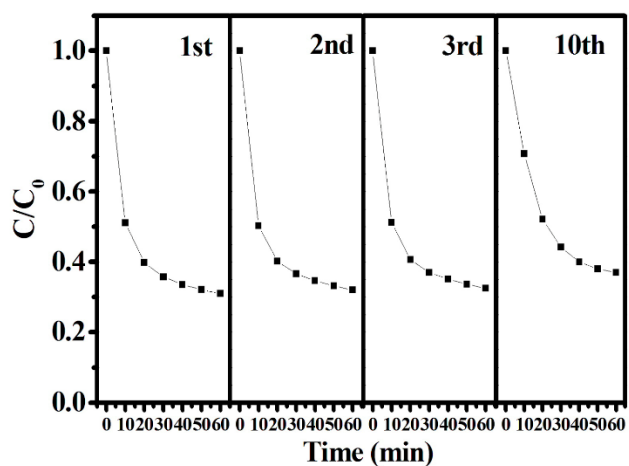

**Fig. 6** Cycling runs in the photocatalytic degradation of DOX in the presence of  $\text{FeWO}_4$  under visible light irradiation ( $[\text{FeWO}_4] = 0.5 \text{ g/L}$ ,  $[\text{PMS}] = 2 \text{ mM}$ ,  $[\text{DOX}] = 40 \text{ mg/L}$ ).
